# Supplementary material for: TNF ΔARE Pigs: A Translational Crohn’s Disease Model
Source: PubMed Central journal article supplement (PMC10320488; doi:10.1093/ecco-jcc/jjad034), 2023-02-23

**A**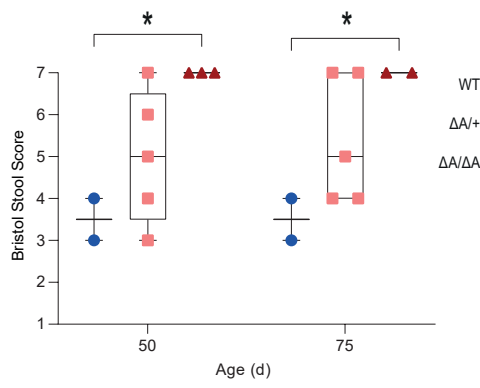**B**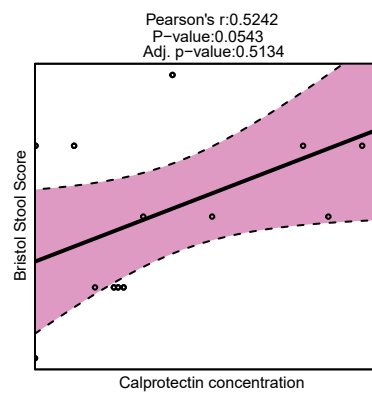**C**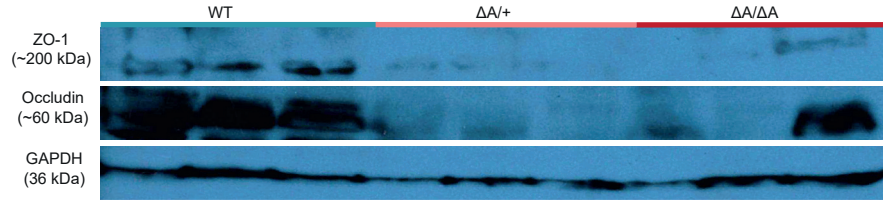**D**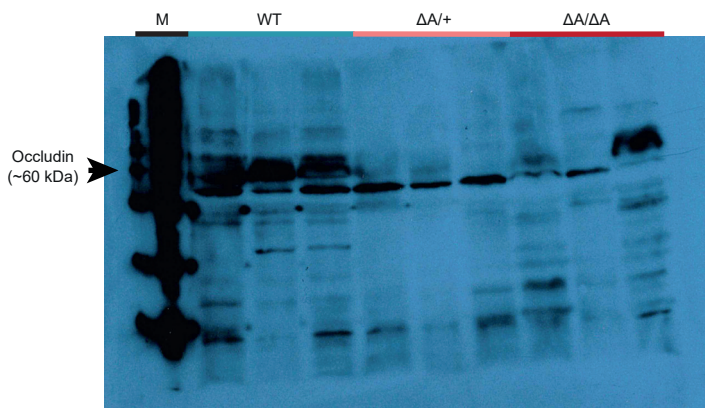**E**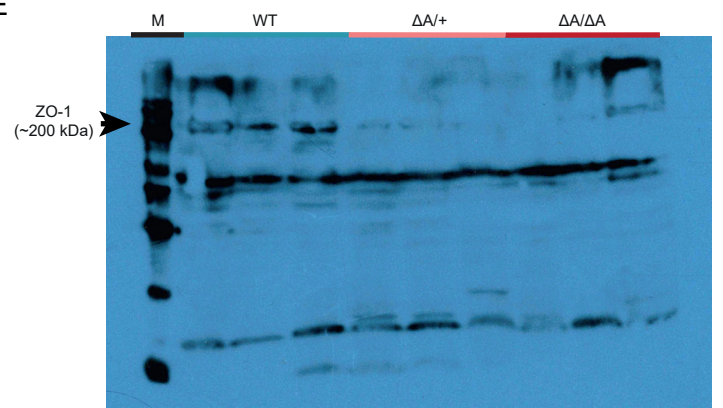**F**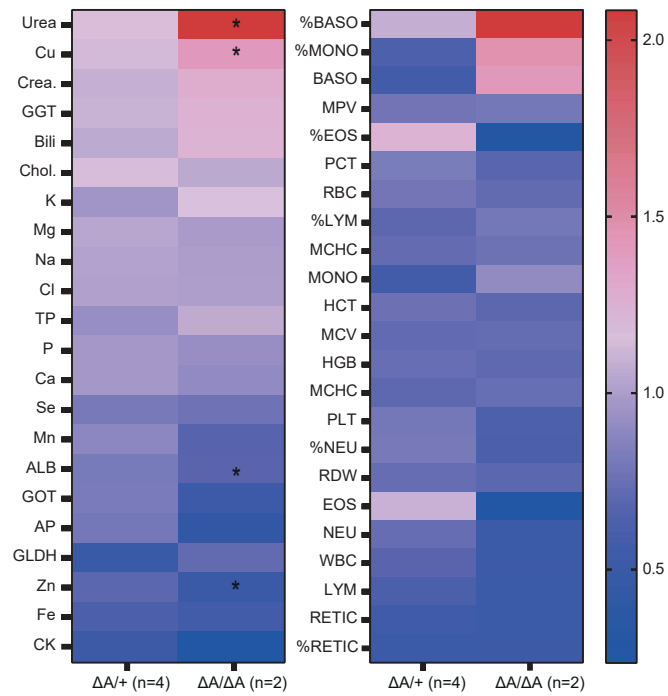

Supplement: jjad034_suppl_supplementary_figure_s1.pdf [file jjad034_suppl_supplementary_figure_s1.pdf]
