# Supplementary material for: TNF ΔARE Pigs: A Translational Crohn’s Disease Model
Source: PubMed Central journal article supplement (PMC10320488; doi:10.1093/ecco-jcc/jjad034), 2023-02-23

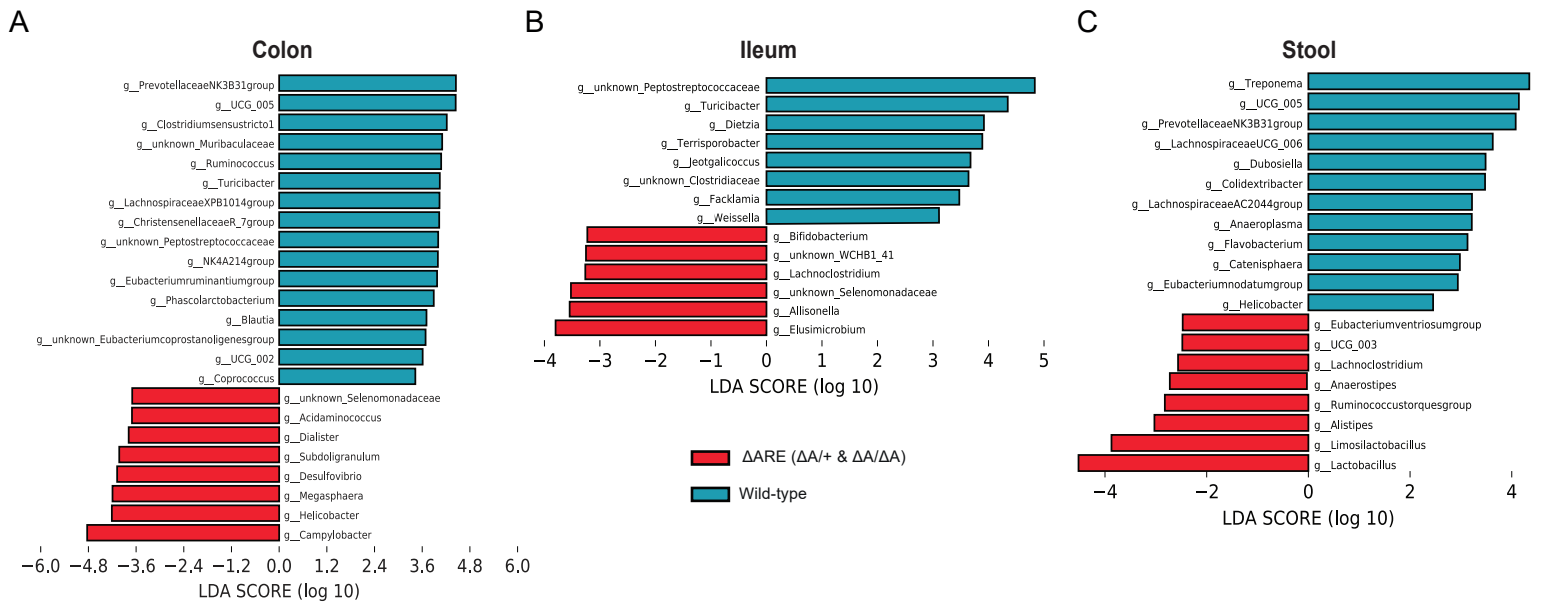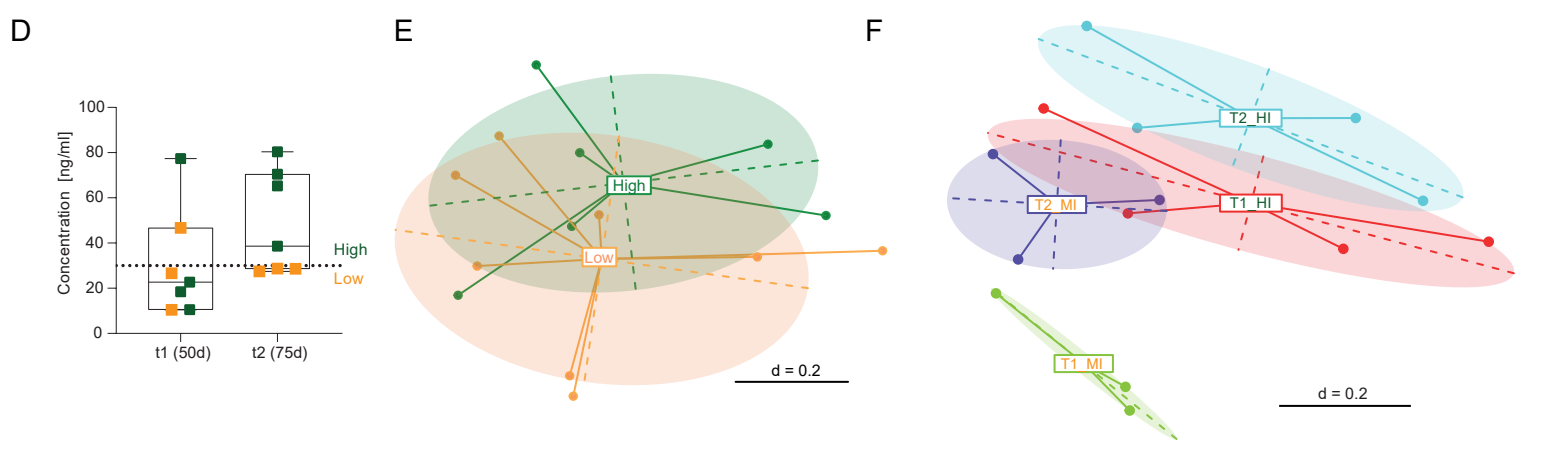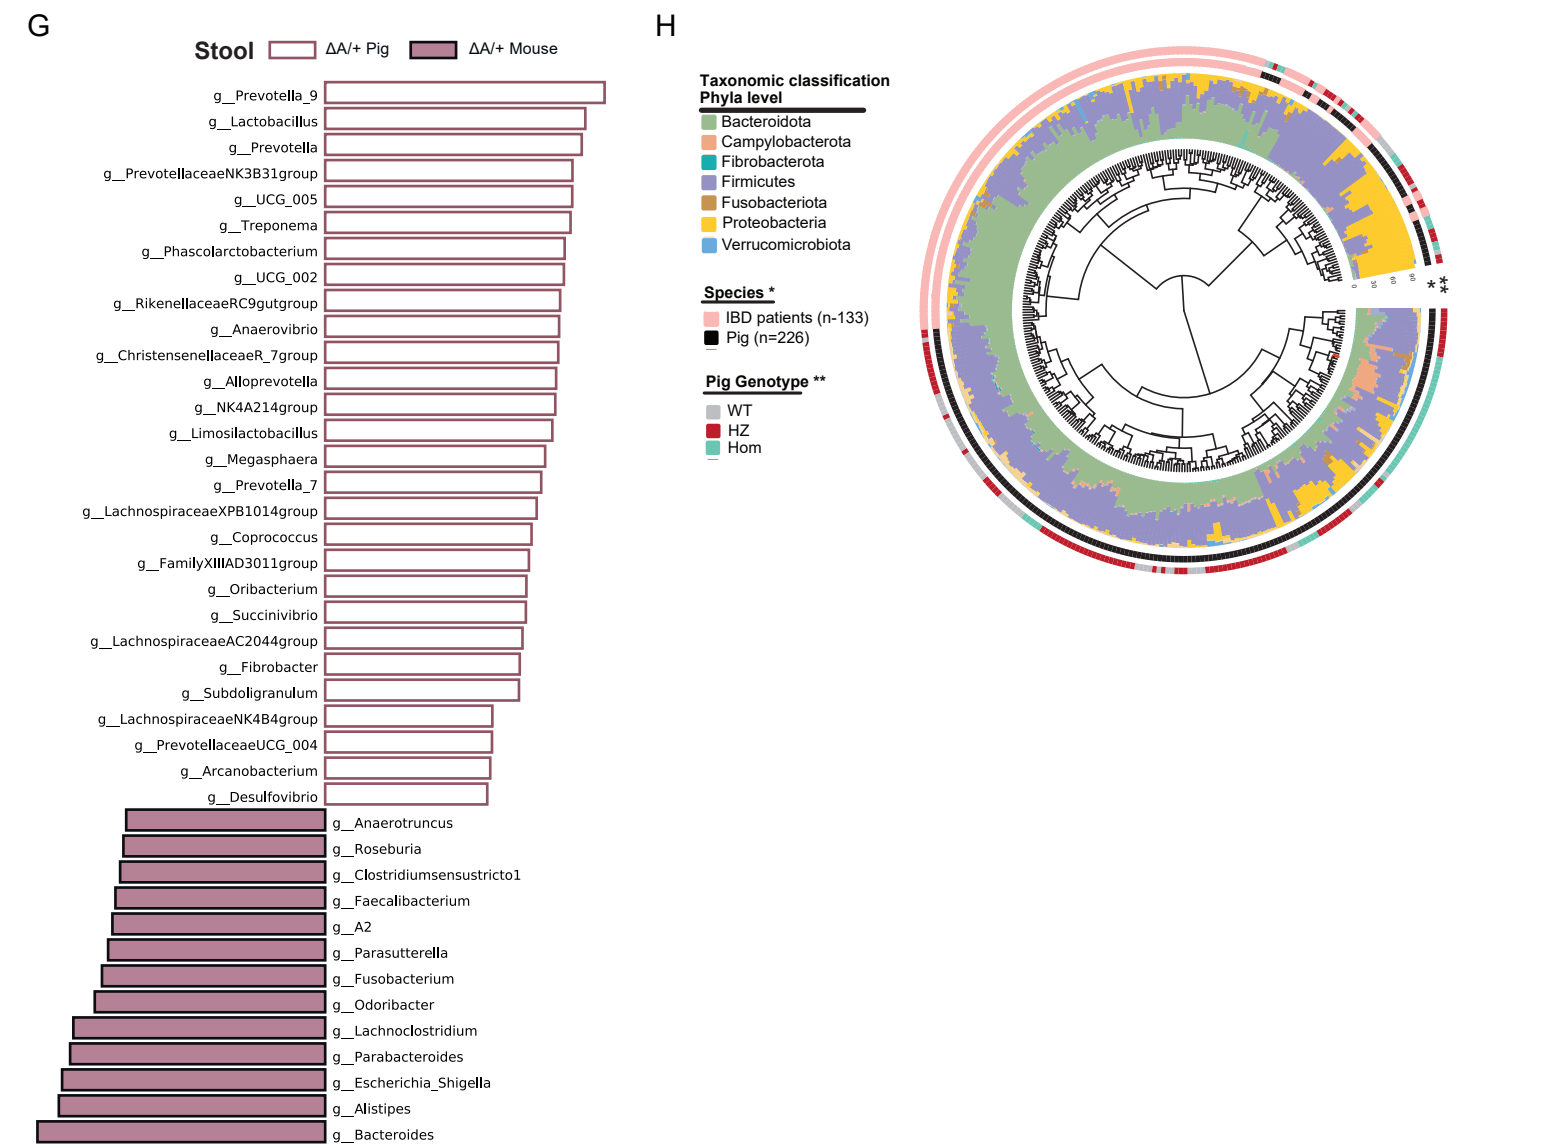

Supplement: jjad034_suppl_supplementary_figure_s2.pdf [file jjad034_suppl_supplementary_figure_s2.pdf]
